1 S. M. Vamosi  
2 University of Calgary Department of Biological Sciences  
3 2500 University Dr NW  
4 Calgary, Alberta Canada T2N1N4  
5 Phone: 403-220-3293  
6 Email: smvamosi@ucalgary.ca

7 **A barcoding approach to phylogenetic classification of Aedini mosquitoes (*Aedes*,**  
8 ***Ochlerotatus*)**

9 H. Glass<sup>1</sup>, E. Carroll<sup>1</sup>, D. Curley<sup>1</sup>, H. Kienzle<sup>1</sup>, D. A. Yee<sup>2</sup>, and S. M. Vamosi<sup>1</sup>

10 <sup>1</sup> University of Calgary Department of Biological Sciences, 2500 University Dr NW Calgary,  
11 Alberta Canada T2N2N4

12 <sup>2</sup> University of Southern Mississippi, Department of Biological Sciences, 118 College Drive  
13 Hattiesburg, Mississippi, United States 39406-0001

## 14 **Abstract**

15 Traditionally, entomologists have used morphological characteristics for mosquito taxonomy  
16 and systematics. However, this approach does not take into consideration the genetic  
17 relatedness of species. In 2000, the *Aedes* genus of mosquitoes in the tribe *Aedini* was split into  
18 two genera (*Aedes* and *Ochlerotatus*), thereby elevating *Ochlerotatus* from subgenus to genus  
19 rank, strictly based on morphology of adults. Herein, we use the genetic barcoding marker COI  
20 to generate a phylogeny of 65 species of *Aedes*, *Ochlerotatus*, and *Anopheles* outgroup from  
21 almost 900 sequences downloaded from BOLD systems. Our results reveal evidence of non-  
22 random, but polyphyletic clustering of *Aedes* and *Ochlerotatus* species, with a monophyletic  
23 outgroup. We do find support for the validity of *Ochlerotatus* as an evolutionary unit, although  
24 we find insufficient evidence to support its retention as a genus. We suggest that mosquito  
25 phylogenetic analyses incorporate a greater number of genetic markers to help clarify our  
26 understanding of *Aedini* species classifications, but caution that recent assessments based  
27 solely on morphology may be insufficient.

28 Keywords: DNA barcoding, COI, Aedini, phylogenetics

## 29 Introduction

30 Insects present significant challenges to systematists for several reasons, including their  
31 incredible diversity (Labandeira and Sepkoski 1993, Whitfield and Kjer 2008), relatively old age  
32 (Dunlop 2010, Whalley 1986), significant variations in diversification rates through time  
33 (Barraclough and Volger 2002, Wiegmann et al. 2011), and morphological similarity among  
34 congeners, especially in larval specimens (Schultz and Meier 1995). Despite a long history of  
35 study as potential vectors of human and animal disease, mosquitoes are no exception to these  
36 systematic challenges. There are 3,552 species of Culicidae (Harbach 2016), with the oldest  
37 fossil being dated to 90-100 million years old (Borkent and Grimaldi 2004). Although there are  
38 few time-calibrated estimates of diversification rates through time, there also is evidence for  
39 rapid radiations early in the history of the group (Reidenbach et al. 2009). Adding to these  
40 issues of classification, reliable identifications are difficult in various species complexes,  
41 especially among some medically relevant species, with some keys requiring male specimens in  
42 some groups and female specimens in others (Chan et al. 2014).

43 Within the Culicidae, taxonomic and systematics relationships are particularly unresolved  
44 within the Tribe Aedini. Here, we focus on controversies surrounding the existence of, and  
45 relationships between, the genera *Aedes* (Meigen 1818, as cited in Harbach 2016) and  
46 *Ochlerotatus* (Meigen 1818, as cited in Harbach 2016). Through a series of morphology-  
47 informed phylogenetic studies, Reinert et al. (2000, 2004, 2006, 2008, 2009) elevated  
48 *Ochlerotatus* to genus status. This decision was based on the analysis of morphological  
49 characteristics of 119 Aedini species across all life stages. The resulting morphology-based  
50 phylogeny proposed this change to the previous classification that was based solely on adult

51 mosquito morphology. These revisions to the genera created instant controversy among  
52 researchers and led to many journals that focus on these medically important species to  
53 suggest caution with adopting the new designations (Reisen 2016). Because many species  
54 within the genus *Aedes* are of significant medical importance (e.g., *Aedes aegypti*),  
55 redesignation of any species would pose challenges for public health officials in relation to  
56 using long standing species names when communicating with the public. In addition, as it has  
57 been nearly two decades since Reinert first proposed elevating *Ochlerotatus* to a genus (Reinert  
58 2000), and using a molecular approach to resolving the phylogenetic relationships among these  
59 species is long overdue. Indeed, in an editorial about Aedini mosquitoes, Reisen (2016) noted:  
60 “As more mosquito sequencing data become available ... genetic analyses should be done to  
61 confirm these phenotypic groupings.”

62 DNA barcoding has been promoted as a universal tool for reliable species identifications  
63 (Hebert et al. 2003, Hebert et al. 2004), and also as a tool for helping to resolve phylogenetic  
64 relationships among species (Hajibabaei et al. 2007, Erpenbeck et al. 2007). The 648 base-pair  
65 mitochondrial cytochrome c oxidase 1 gene (COI) is regarded as the standardized barcode gene  
66 for species identification (iBOL 2018). Thus far, there is a mixed record of success of using COI  
67 sequences for these purposes for mosquitoes. In an early application of this approach to  
68 mosquito identification, Kumar et al. (2007) analyzed 63 species from 15 genera found in India,  
69 successfully identifying 62 species. However, they were unable to distinguish between  
70 *Ochlerotatus portonovoensis* and *O. wardi*, which are considered closely related species based  
71 on morphology (Reinert et al. 2004). Curiously, Kumar et al. (2007) presented a phylogenetic  
72 tree of their species, which they claimed (Kumar et al. 2007, pg. 7), “was in general agreement

73 with the taxonomy based on morphology as reported previously”, although it contained several  
74 glaring discrepancies from traditional taxonomic schemes. Notably, no *Aedes*, *Culex*, or  
75 *Ochlerotatus* were recovered as monophyletic, yet these issues were not explicitly identified.  
76 Chan et al. (2014) analyzed 45 species from 13 genera found in Singapore, and reported a 100%  
77 success rate in identifying mosquito species. Similar to Kumar et al. (2007), they presented  
78 phylogenetic trees but once again did not draw attention to apparent discrepancies. In the  
79 phylogeny composed of *Aedes*, *Verrallina*, and *Ochlerotatus* species, the sole *Verrallina*  
80 representative (*V. butleri*) was clustered together with an *Aedes* species (*A. collessi*) and an  
81 *Ochlerotatus* species (*O. cogilli*) in an interior clade, rendering *Aedes* non-monophyletic.  
82 Additionally, the two *Ochlerotatus* species included (*O. cogilli*, *O. vigilax*) did not form a  
83 monophyletic grouping. Most recently, Chu et al. (2016) constructed phylogenetic trees for 34  
84 mosquito species using complete mitogenomes, as well as the COI barcoding gene. Although  
85 their investigation was not designed to resolve the validity of the genus *Ochlerotatus*, with the  
86 majority of sequences representing the genus *Anopheles*, it contained three *Aedes* species and  
87 one *Ochlerotatus* species. Relevant to our questions, the genus *Aedes* was not found to be  
88 monophyletic relative to *O. vigilax* (or *Haemagogus janthinomys*) in either dataset.

89 Herein we make use of publicly available DNA barcode data to assess the validity of the  
90 genus *Ochlerotatus* relative to *Aedes*, following Reisen’s (2016) call to action. Unlike previous  
91 investigations, which overrepresented other taxa (notably *Anopheles* or *Culex*), we specifically  
92 targeted *Aedes* and *Ochlerotatus* sequences with the explicit goal of testing their relative  
93 monophyly, using an appropriate outgroup (*Anopheles*). We predicted that if *Ochlerotatus* is a  
94 valid evolutionary unit, minimally as a subgenus, that our included *Ochlerotatus* species should

95 cluster together separate from *Aedes* with high bootstrap support.

## 96 **Methods**

### 97 **Species Selection**

98 All current and previous genus and species names were confirmed using the literature on  
99 Aedini taxonomy (e.g., Wilkerson et al. 2015). The group we call “True *Aedes*” are those species  
100 that have previously been classified in the *Aedes* genus and were not part of the *Ochlerotatus*  
101 subgenus or reclassified into the new *Ochlerotatus* genus by Reinert et al. (2000, 2004, 2006).  
102 The “*Ochlerotatus*” group comprises those species that were previously part of the  
103 *Ochlerotatus* subgenus of *Aedes* or were reclassified into the new *Ochlerotatus* genus by  
104 Reinert et al. (2000, 2004, 2006). The genus *Anopheles* was selected as the outgroup for the  
105 analysis because it is a separate genus that is part of the same family (Culicidae) as  
106 *Aedes/Ochlerotatus*.

### 107 **Obtaining Sequences**

108 Sequences were downloaded from the Barcode of Life Data (BOLD) Systems (Ratnasingham  
109 and Hebert 2013) in FASTA file format and later compiled into one master file, comprising a  
110 total of 873 sequences. The sequences cover the COI barcode region of the mitochondrial  
111 genome, spanning approximately 650 base pairs. All *Aedes* and *Ochlerotatus* species that had  
112 repositories on BOLD were downloaded, but we excluded those that had less than three  
113 sequences available for a given species to ensure the sample size was large enough to  
114 represent that species. The maximum number of sequences used for each species was 20. In  
115 most cases, the first 20 sequences were selected and downloaded. Otherwise, the sequence

116 files were viewed in Molecular Evolutionary Genetic Analysis (MEGA) version 7 (Kumar et al.  
117 2015), and the ones with the most coverage were randomly selected. All of the sequences were  
118 manually inspected in MEGA, and those which had unknown “N” bases, missing data, or were  
119 not properly aligned were removed from the analysis. In total, 873 sequences were used for  
120 analysis (Table 1).

121 **Table 1.** Total number of species and sequences for each of the three groups used in the  
122 analysis of *Aedes-Ochlerotatus* mosquitoes.

|                            | <b>True <i>Aedes</i></b> | <b><i>Ochlerotatus</i></b> | <b>Outgroup</b> |
|----------------------------|--------------------------|----------------------------|-----------------|
| <b>Number of Species</b>   | 21                       | 36                         | 8               |
| <b>Number of Sequences</b> | 269                      | 501                        | 103             |

## 123 **Phylogenetic Analyses**

124 Maximum Likelihood (ML), Neighbor Joining (NJ), and Bayesian Inference (BI) methods were  
125 employed to generate phylogenies, which were then visualized in FigTree version 1.4.2  
126 (Rambaut 2009). This approach allowed us to compare the congruence of resultant trees. The  
127 command line program Randomized Accelerated Maximum Likelihood (RAxML) version 8.0.0  
128 was used to generate the Maximum Likelihood phylogenetic tree (Stamatakis 2014). A  
129 bootstrap analysis with 1000 replicates was performed using the sequence master file with all  
130 873 sequences. This tree was inspected to confirm monophyly of species, and those species  
131 that failed to be monophyletic were removed from the analysis. Next, one representative  
132 sequence from each monophyletic species was selected and the above bootstrap analysis was  
133 replicated to generate a ML consensus tree. The trees generated with the master file and with

134 one sequence per species were compared to confirm there were no changes in topology of the  
135 tree. Ultimately, 26 True *Aedes*, 37 *Ochlerotatus*, and eight *Anopheles* outgroup species were  
136 selected for further analyses.

137 With the same selected sequences from above, a Bayesian Inference analysis with  
138 corresponding posterior probability support values was generated using MrBayes version 3.2.6  
139 (Ronquist et al. 2012) for 1,000,000 generations. Rate heterogeneity was estimated using a  
140 gamma distribution model for the variable sites and the first 25% of samples were discarded as  
141 burnin. Because only one outgroup could be specified in the program, *Anopheles marajoara*  
142 was randomly selected from the *Anopheles* species to be listed as the outgroup. Finally, a  
143 Neighbor Joining tree was generated in MEGA version 7 (Kumar et al. 2015) using a Kimura  
144 two-parameter model. Bootstrap values were also calculated with 1,000 replicates.

## 145 Results

146 Phylogenetic trees were generated via ML, NJ, and BI methods. Using all 873 COI barcode  
147 sequences for a ML analysis, we determined that a majority of species clustered together as  
148 monophyletic (S1 Fig.). Using one representative sequence from each species, we generated  
149 consensus phylogenetic trees (Fig. 1, Fig. 2, Fig. 3). As expected, almost all subspecies were  
150 recovered and clustered together with significant support values; *A. aegypti* and *A. aegypti*  
151 *aegypti* (ML 100, BI 100, NJ 100), *A. flavopictus downsi* and *A. flavopictus miyarai* (ML 100, BI  
152 99.2, NJ 100), and *A. vexans* and *A. vexans nipponii* (ML 80, BI 94.8, NJ 100). Conversely, *A.*  
153 *japonicus* and *A. japonicus yaeyamensis* were positioned one node away (ML 96, BI 41.3, NJ  
154 100), clustering *A. japonicus yaeyamensis* with *A. koreicus* with generally lower support values  
155 (ML 63, BI 61.1, NJ 88). Finally, we note that even when we did not specify them as constituting



156 an outgroup (i.e., unrooted phylogeny), *Anopheles* was monophyletic and sister to the group  
157 containing the remaining sequences.

158 With regard to our main question, the resulting trees did not totally align with the  
159 morphology-based classifications previously suggested by Reinert et al. (2000, 2004, 2006,  
160 2008, 2009). Overall, neither *Aedes* nor *Ochlerotatus* were monophyletic in any of the  
161 phylogenies generated (Fig. 1, Fig. 2, Fig. 3, S1 Table). We found evidence of non-random  
162 clustering consistent across all three phylogenies: (i) in one major group, there was only a single  
163 *Ochlerotatus* species (*O. atlanticus*), which was sister to 18 *Aedes* taxa in the ML, BI, and NJ  
164 trees, (ii) the remaining *Ochlerotatus* species (N = 36) were contained in the other major group,  
165 which were (iii) consistently associated with seven *Aedes* taxa (*A. japonicus*, *A. japonicus*  
166 *yaeyamensis*, *A. koreicus*, *A. watasei*, *A. aureostriatus okinawanus*, *A. togoi*, *A. geniculatus*) with  
167 generally good agreement between the methods in relative positioning among four of the  
168 seven *Aedes* species (Fig. 1, Fig. 2, Fig. 3). By treating the former as the ‘*Aedes* clade’ and the  
169 latter as the ‘*Ochlerotatus* clade’, we performed *post hoc* contingency tests to assess the  
170 strength of these associations. Because of the high congruence in the tree resulting from the  
171 three methods, we used only the ML tree to prevent pseudoreplication. By doing so, we find  
172 that the ‘*Aedes* clade’ contained significantly fewer *Ochlerotatus* species than expected by  
173 chance (Fisher’s exact test,  $P = 0.003$ ). Similarly, the ‘*Ochlerotatus* clade’ contained significantly  
174 fewer *Aedes* species than expected by chance (Fisher’s exact test,  $P < 0.001$ ).

## 175 **Discussion**

176 Given the medical importance of mosquitoes within the traditional *Aedes* genus, there is a  
177 need for robust data to support revisions to longstanding names for species and to clarify

178 relationships among species. Here, we present our first response to Reisen's (2016) call to bring  
179 genetic data to bear on morphologically-based species groupings. With extensive debate  
180 surrounding the genera *Aedes* and *Ochlerotatus*, our analysis attempted to clarify the  
181 phylogeny of these groups using molecular data and to compare our results to phylogenies  
182 obtained through morphological characteristics. Our analyses produced three main findings in  
183 each of the three phylogenetic methods utilized: (1) Sequences associated with a particular  
184 species were generally found to cluster together; (2) *Aedes* and *Ochlerotatus* are not  
185 reciprocally monophyletic; and (3) Despite the lack of strict monophyly, our *post hoc* analyses  
186 support the existence of non-random associations among *Aedes* and *Ochlerotatus* "congeners"  
187 in our dataset. The latter finding suggests that some "*Ochlerotatus*" species may form a valid  
188 evolutionary unit, although we find insufficient evidence to support its retention as a genus,  
189 which echoes conclusions made by Wilkerson et al. (2015) and Soghigian et al. (2017) based on  
190 phenotypic and molecular data, respectively.

191 The observed lack of reciprocal monophyly of *Aedes* and *Ochlerotatus* may result in part,  
192 but not completely, from relatively low support values in parts of all three phylogenies. With  
193 regard to the ML tree, bootstrap values of 70 and above correlate with  $\geq 95\%$  chance that the  
194 suggested clade is valid (Hillis and Bull 1993). Thirty nodes have high bootstrap values greater  
195 than 70, whereas 38 nodes fall below this threshold (Fig. 1). The node separating the '*Aedes*  
196 clade' from the '*Ochlerotatus* clade' did have high support in both the ML and BI trees (support  
197 value = 100 in both cases), although the NJ tree contained a three-way polytomy of these  
198 clades together with the outgroup. The low support values associated with some nodes could  
199 be a result of the species being too closely related to differentiate, or they could indicate that

200 more molecular markers are needed to analyze these species. The results are unlikely to be  
201 based on identification errors, given that we observed only three instances where all 10  
202 sequences for a species or subspecies did not cluster together with high bootstrap support. Due  
203 to the difficulty of identifying Aedini mosquitoes based on morphological characteristics,  
204 inaccurate species naming in BOLD is plausible. Incorrect species naming in online genetic  
205 databases has been found in previous studies (e.g., misidentification of spider mite species was  
206 detected in COI sequences downloaded from GenBank (Ros and Breeuwer 2007)). With regard  
207 to overall bootstrap support, we note that Chu et al. (2016) also reported low values in their  
208 phylogeny, including at basal nodes. Our results suggest that morphology alone is not an  
209 accurate representation for mosquito systematics, and that molecular differences among the  
210 proposed genera point to additional uncertainty in placement of species.

211 Previous studies have identified significant limitations in the application of COI  
212 barcoding to molecular phylogenetics (Dupuis et al. 2012, Hajibabaei et al. 2007, Moritz and  
213 Cicero 2004). Although COI barcoding is generally quite effective at differentiating between  
214 species, it is not considered to be appropriate for illuminating deeper evolutionary relationships  
215 (Hajibabaei et al. 2007). However, Hajibabaei et al. (2007) suggested that COI barcoding can be  
216 used to aid in choosing taxa for phylogenetic analysis, as well as providing greater confidence  
217 for shallow evolutionary divergence between species. This indicates that although a COI-based  
218 phylogeny such as this should not be interpreted as providing resolution toward the deep  
219 evolutionary history of these genera, it can be considered a first step towards a more  
220 comprehensive molecular phylogeny (see also: Reece et al. 2008, Zhang and Hewitt 1997).  
221 Interestingly, support values do not consistently decline with depth in any of our trees. We

222 suggest that next steps in resolving these genera may be to (1) apply multiple markers, and (2)  
223 perform phylogenetic analyses with those genetic data that include phenotypic data as a data  
224 partition. Using multiple markers, such as additional nuclear markers commonly used in insect  
225 systematics (e.g., *wng*, H3, 18S), would increase the probability of successful delimitation  
226 between closely related species, and ultimately generate a more detailed and robust phylogeny  
227 (Dupuis et al. 2012). With regard to phenotypic data, there are 336 characters, of which 14 are  
228 ordered characters (Wilkerson et al. 2015) that could be represented as a data partition in a  
229 Bayesian phylogenetic approach (Drummond et al. 2012). We suggest that an analysis with a  
230 greater number of genetic markers, possibly including phenotypic data, be performed for these  
231 species for a more accurate representation of their phylogenetic relationships.

232       Subsequent to commencing our study, we became aware of a related investigation by  
233 Soghigian et al. (2017). Soghigian et al. (2017) were particularly interested in the spread of  
234 invasive *Aedes* mosquitoes, and attempted to reconstruct the evolution of habitat  
235 specialization within the larger group (Aedini). Accordingly, they did not set out to resolve the  
236 separation of *Aedes* from *Ochlerotatus*, both of which were treated as *Aedes* subgenera, but  
237 their findings are relevant to our overall conclusions. They recovered two major clades with  
238 high levels of support, with *Ochlerotatus* being part of Clade B and *Aedes* part of Clade A.  
239 However, similar to our findings, *Ochlerotatus* was not monophyletic within its clade.  
240 Furthermore, Clade A contained other aedine genera, rendering the genus *Aedes* itself non-  
241 monophyletic. Collectively, our results (see also Kumar et al. 2007, Chan et al. 2014, Chu et al.  
242 2016) find little evidence for *Ochlerotatus* being a valid genus, or even subgenus as currently  
243 described.

244 Because Aedini mosquitos are vectors for disease such as yellow fever, malaria, dengue, and  
245 West Nile, having confidence in their phylogenetic relationships has implications for public  
246 health management. DNA barcoding is an easy standardized method that is an inexpensive way  
247 to account for genetics in taxonomy. In this case, there is little need for specialists to make  
248 morphology-based species identifications, because species identities can be based on DNA at  
249 any life stage. A genetic barcoding approach should serve as an additional tool for taxonomists  
250 to supplement their knowledge as well as being an innovative device for non-experts who need  
251 to make a quick identification. Ultimately, entomologists should incorporate both morphology  
252 and genetics into species classification analyses, which has never been done before.

## 253 **Acknowledgements**

254 Author contributions: Methodology, Formal Analysis, Visualization, Project Administration: HG.  
255 Data Curation, Resources: EC, DC, HK. Conceptualization, Supervision: SMV, DY. Writing-Original  
256 Draft Preparation: HG, EC, DC, HK, SMV. Writing-Review & Editing: HG, SMV, DY.

## 257 **References**

258 Barraclough, T. G., and A. P. Vogler. 2002. Recent diversification rates in North American tiger  
259 beetles estimated from a dated mtDNA phylogenetic tree. *Mol Biol Evol.* 19(10): 1706-1716.  
260 Borkent, A., and D. A. Grimaldi. 2004. The earliest fossil mosquito (Diptera: Culicidae), in the  
261 mid-cretaceous burmese amber. *An Entomol Soc Am.* 97(5): 882-888.  
262 Chan, A., Chiang, L., Hapuarachchi, H. C., Tan, C., Pang, S., Lee, R., Lee, K., Ng, L., and S. Lam-  
263 Phua. 2014. DNA barcoding: complementing morphological identification of mosquito  
264 species in Singapore. *Parasit Vectors.* 7: 569.

- 265 Chu, H., Li, C., Guo, X., Zhang, H., Luo, P., Wu, Z., Wang, G., and T. Zhao. 2016. The phylogenetic  
266 relationships of known mosquito (Diptera: Culicidae) mitogenomes. *Mitochondrial DNA A*  
267 *DNA Mapp Seq Anal.* 29(1): 31-35.
- 268 Drummond, A. J., Suchard, M. A., Xie, D., and A. Rambaut. 2012. Bayesian Phylogenetics with  
269 BEAUti and the BEAST 1.7. *Mol Biol Evol.* 29(8): 1969-1973.
- 270 Dunlop, J. A. 2010. Geological history and phylogeny of Chelicerata. *Arthropod Struct Dev.*  
271 39(2): 124-142.
- 272 Dupuis, J. R., Roe, A. D., and F. A. Sperling. 2012. Multi-locus species delimitation in closely  
273 related animals and fungi: one marker is not enough. *Mol Ecol.* 21(18): 4422-4436.
- 274 Erpenbeck, D., Duran, S., Rützler, K., Paul, V., Hooper, J. N., and G. Wörheide. 2007. Towards a  
275 DNA taxonomy of Caribbean demosponges: a gene tree reconstructed from partial  
276 mitochondrial COI gene sequences supports previous rDNA phylogenies and provides a new  
277 perspective on the systematics of Demospongiae. *J Mar Biol Assoc U.K.* 87(06): 1563-1570.
- 278 Hajibabaei, M., Singer, G. A., Hebert, P. D., and D. A. Hickey. 2007. DNA barcoding: how it  
279 complements taxonomy, molecular phylogenetics and population genetics. *Trends Genet.*  
280 23(4): 167-172.
- 281 Harbach, R. 2016. Mosquito taxonomic inventory valid species. Available from:  
282 <http://mosquito-taxonomic-inventory.info/valid-species-list>
- 283 Hebert, P. D., Cywinska, A., and S. L. Ball. 2003. Biological identifications through DNA barcodes.  
284 *Proc Biol Sci.* 270(1512): 313-321.
- 285 Hebert, P. D., Stoeckle, M. Y., Zemplak, T. S., and C. M. Francis. 2004. Identification of birds  
286 through DNA barcodes. *PLoS Biol.* 2(10): e312.

- 287 Hillis, D. M., and J. J. Bull. 1993. Empirical testing of bootstrapping as a method for assessing  
288 confidence in phylogenetic analysis. *Syst Biol.* 42(2): 182-192.
- 289 (iBOL) international Barcode of Life. 2018. What is DNA Barcoding? How DNA Barcoding Works  
290 and What it Will Do. Available from: <http://ibol.org/about-us/what-is-dna-barcoding/>
- 291 Kumar, N. P., Rajavel, A. R., Natarajan, R., and P. Jambulingam. 2007. DNA barcodes can  
292 distinguish species of Indian mosquitoes (Diptera: Culicidae). *J Med Entomol.* 44(1): 1-7.
- 293 Kumar, S., Stecher, G., and K. Tamura. 2015. MEGA7: Molecular Evolutionary Genetics Analysis  
294 version 7.0. *Mol Biol Evol.* 33(7): 1870-1874.
- 295 Labandeira, C. C., and J. J. Sepkoski. 1993. Insect diversity in the fossil record. *Science.*  
296 261(5119): 310-315.
- 297 Moritz, C., and C. Cicero. 2004. DNA barcoding: promise and pitfalls. *PLoS Biol.* 2(10), e354.
- 298 Rambaut, A. 2009. FigTree, version 1.4.2. <http://treebioedacuk/software/figtree/>
- 299 Ratnasingham, S., and P. D. Hebert. 2013. A DNA-based registry for all animal species: the  
300 barcode index number (BIN) system. *PLoS One.* 8(8): e66213.
- 301 Reece, K. S., Cordes, J. F., Stubbs, J. B., Hudson, K. L., and E. A. Francis. 2008. Molecular  
302 phylogenies help resolve taxonomic confusion with Asian *Crassostrea* oyster species. *Mar*  
303 *Biol.* 153(4): 709-721.
- 304 Reidenbach, K. R., Cook, S., Bertone, M. A., Harbach, R. E., Wiegmann, B. M., and N. J. Besansky.  
305 2009. Phylogeny analysis and temporal diversification of mosquitoes (Diptera: Culicidae)  
306 based on nuclear genes and morphology. *BMC Evol Biol.* 9: 298.
- 307 Reinert, J. F. 2000. New classification for the composite genus *Aedes* (Diptera: Culicidae:  
308 *Aedini*), elevation of subgenus *Ochlerotatus* to generic rank, reclassification of the other

- 309 subgenera, and notes on certain subgenera and species. *J Am Mosq Control Assoc.* 16: 175-  
310 188.
- 311 Reinert, J. F., Harbach, R. E., and I. J. Kitching. 2004. Phylogeny and classification of Aedini  
312 (Diptera: Culicidae), based on morphological characters of all life stages. *Zool J Linn Soc.*  
313 142(3): 289-368.
- 314 Reinert, J. F., Harbach, R. E., and I. J. Kitching. 2006. Phylogeny and classification of Finlaya and  
315 allied taxa (Diptera: Culicidae: Aedini) based on morphological data from all life stages. *Zool J*  
316 *Linn Soc.* 148(1): 1-101.
- 317 Reinert, J. F., Harbach, R. E., and I. J. Kitching. 2008. Phylogeny and classification of  
318 Ochlerotatus and allied taxa (Diptera: Culicidae: Aedini) based on morphological data from  
319 all life stages. *Zool J Linn Soc.* 153(1): 29-114.
- 320 Reinert, J. F. 2009. List of abbreviation for currently valid generic-level taxa in family Culicidae  
321 (Diptera). *Eur Mosq Bull.* 27: 68-76.
- 322 Reisen, W. K. 2005. Journal of Medical Entomology policy on names of Aedine mosquito genera  
323 and subgenera. *J Med Entomol.* 42(4): 511.
- 324 Reisen, W. K. 2016. Update on journal policy of Aedine mosquito genera and subgenera. *J Med*  
325 *Entomol.* 53(2): 249.
- 326 Ronquist, F., Teslenko, M., van der Mark, P., Ayres, D. L., Darling, A., Höhna, S., Larget, B., Liu, L.,  
327 Suchard, M. A., and J. P. Huelsenbeck. 2012. MrBayes 3.2: Efficient Bayesian Phylogenetic  
328 Inference and Model Choice Across a Large Model Space. *Syst Biol.* 61(3): 539-542.
- 329 Ros, V. I. D., and J. A. J. Breeuwer. 2007. Spider mite (Acari: tetranychidae) mitochondrial COI  
330 phylogeny reviewed: host plant relationships, phylogeography, reproductive parasites and



- 331        barcoding. *Exp and App Acarol.* 42(4): 239-262.
- 332        Schultz, T. R., and R. Meier. 1995. A phylogenetic analysis of the fungus-growing ants  
333        (Hymenoptera: Formicidae: Attini) based on morphological characters of the larvae. *Syst*  
334        *Entomol.* 20(4): 337-370.
- 335        Soghigian, J., Andreadis, T. G., and T. P. Livdahl. 2017. From ground pools to treeholes:  
336        convergent evolution of habitat and phenotype in *Aedes* mosquitoes. *BMC Evol Biol.* 17: 262.
- 337        Stamatakis, A. 2014. RAxML Version 8: A tool for phylogenetic analysis and post-analysis of  
338        large phylogenies. *Bioinform.* 30(9): 1312-1313.
- 339        Whalley, P. 1986. A review of the current fossil evidence of Lepidoptera in the Mesozoic. *Biol J*  
340        *Linn Soc Lond.* 28: 253–271.
- 341        Whitfield, J. B., and K. M. Kjer. 2008. Ancient rapid radiations of insects: challenges for  
342        phylogenetic analysis. *Annu Rev Entomol.* 53: 449-472.
- 343        Wiegmann, B. M., Trautwein, M. D., Winkler, I. S., Barr, N. B., Kim, J. W., Lambkin, C., Bertone,  
344        M. A., Cassel, B. K., Bayless, K. M., Heimberg, A. M., Wheeler, B. M., Peterson, K. J., Pape, T.,  
345        Sinclair, B. J., Skevington, J. H., Blagoderov, V., Caravas, J., Kutty, N., Schmidt-Ott, U.,  
346        Kampmeier, G. E., Thompson, F. C., Grimaldi, D. A., Beckenbach, A. T., Courtney, G. W.,  
347        Freidrich, M., Meier, R., and D. K. Yeates. 2011. Episodic radiations in the fly tree of life. *Proc*  
348        *Natl Acad Sci U S A.* 108(14): 5690-5695.
- 349        Wilkerson, R. C., Linton, Y. M., Fonseca, D. M., Schultz, T. R., Price, D. C., and D. A. Strickman.  
350        2015. Making mosquito taxonomy useful: A stable classification of tribe aedini that balances  
351        utility with current knowledge of evolutionary relationships. *PLoS One.* 10(7): e0133602.
- 352        Zhang, D. X., and G. M. Hewitt. 1997. Assessment of the universality and utility of a set of

353 conserved mitochondrial COI primers in insects. *Insect Mol Biol.* 6(2): 143-150.

## 354 **Figure and Supporting Information Captions**

355 **Fig 1. Maximum Likelihood phylogeny of Aedini species based on COI barcoding sequences.**

356 Phylogeny generated with RAxML version 8.0.0 (Stamatakis 2014) of True *Aedes*, *Ochlerotatus*,  
357 and outgroup species. A. is *Aedes* genus and O. is *Ochlerotatus* genus. Numbers at each node  
358 represent bootstrap values. Tree visualized in FigTree version 1.4.2 (Rambaut 2009).

359 **Fig 2. Bayesian Inference phylogeny of Aedini species based on COI barcoding sequences.**

360 Phylogeny generated with MrBayes version 3.2.6 (Ronquist et al. 2012) of True *Aedes*,  
361 *Ochlerotatus*, and outgroup species. A. is *Aedes* genus and O. is *Ochlerotatus* genus.  
362 Percentages at each node represent posterior probabilities. Tree visualized in FigTree version  
363 1.4.2 (Rambaut 2009).

364 **Fig 3. Neighbor Joining phylogeny of Aedini species based on COI barcoding sequences.**

365 Phylogeny generated with MEGA version 7 (Kumar et al. 2015) of True *Aedes*, *Ochlerotatus*, and  
366 outgroup species. A. is *Aedes* genus and O. is *Ochlerotatus* genus. Numbers at each node  
367 represent bootstrap values. Tree visualized in FigTree version 1.4.2 (Rambaut 2009).

368 **S1 Fig. Maximum Likelihood phylogenetic tree of all 873 sequences.** ML phylogeny generated

369 by RAxML version 8.0.0 as a bootstrap analysis with 1000 replicates and visualized in FigTree  
370 (Stamatakis 2014, Rambaut 2009). Each branch tip states the accession number and default  
371 species names from BOLD and bootstrap values are at each node. Note that many species are  
372 named *Aedes* here because they were uploaded to BOLD before those species were reclassified  
373 to *Ochlerotatus*. Genus names in Fig 1 (in text) were changed to reflect species name  
374 reclassification.

375 **S1 Table. Species name and accession number for the sequences used in the analysis.** One  
376 sequence from each species was randomly selected from the 873 total sequences, and these  
377 sequences were used in the bootstrap analysis to generate Fig 1.

bioRxiv preprint doi: <https://doi.org/10.1101/285825>; this version posted March 20, 2018. The copyright holder for this preprint (which was not certified by peer review) is the author/funder, who has granted bioRxiv a license to display the preprint in perpetuity. It is made available under aCC-BY-NC-ND 4.0 International license.

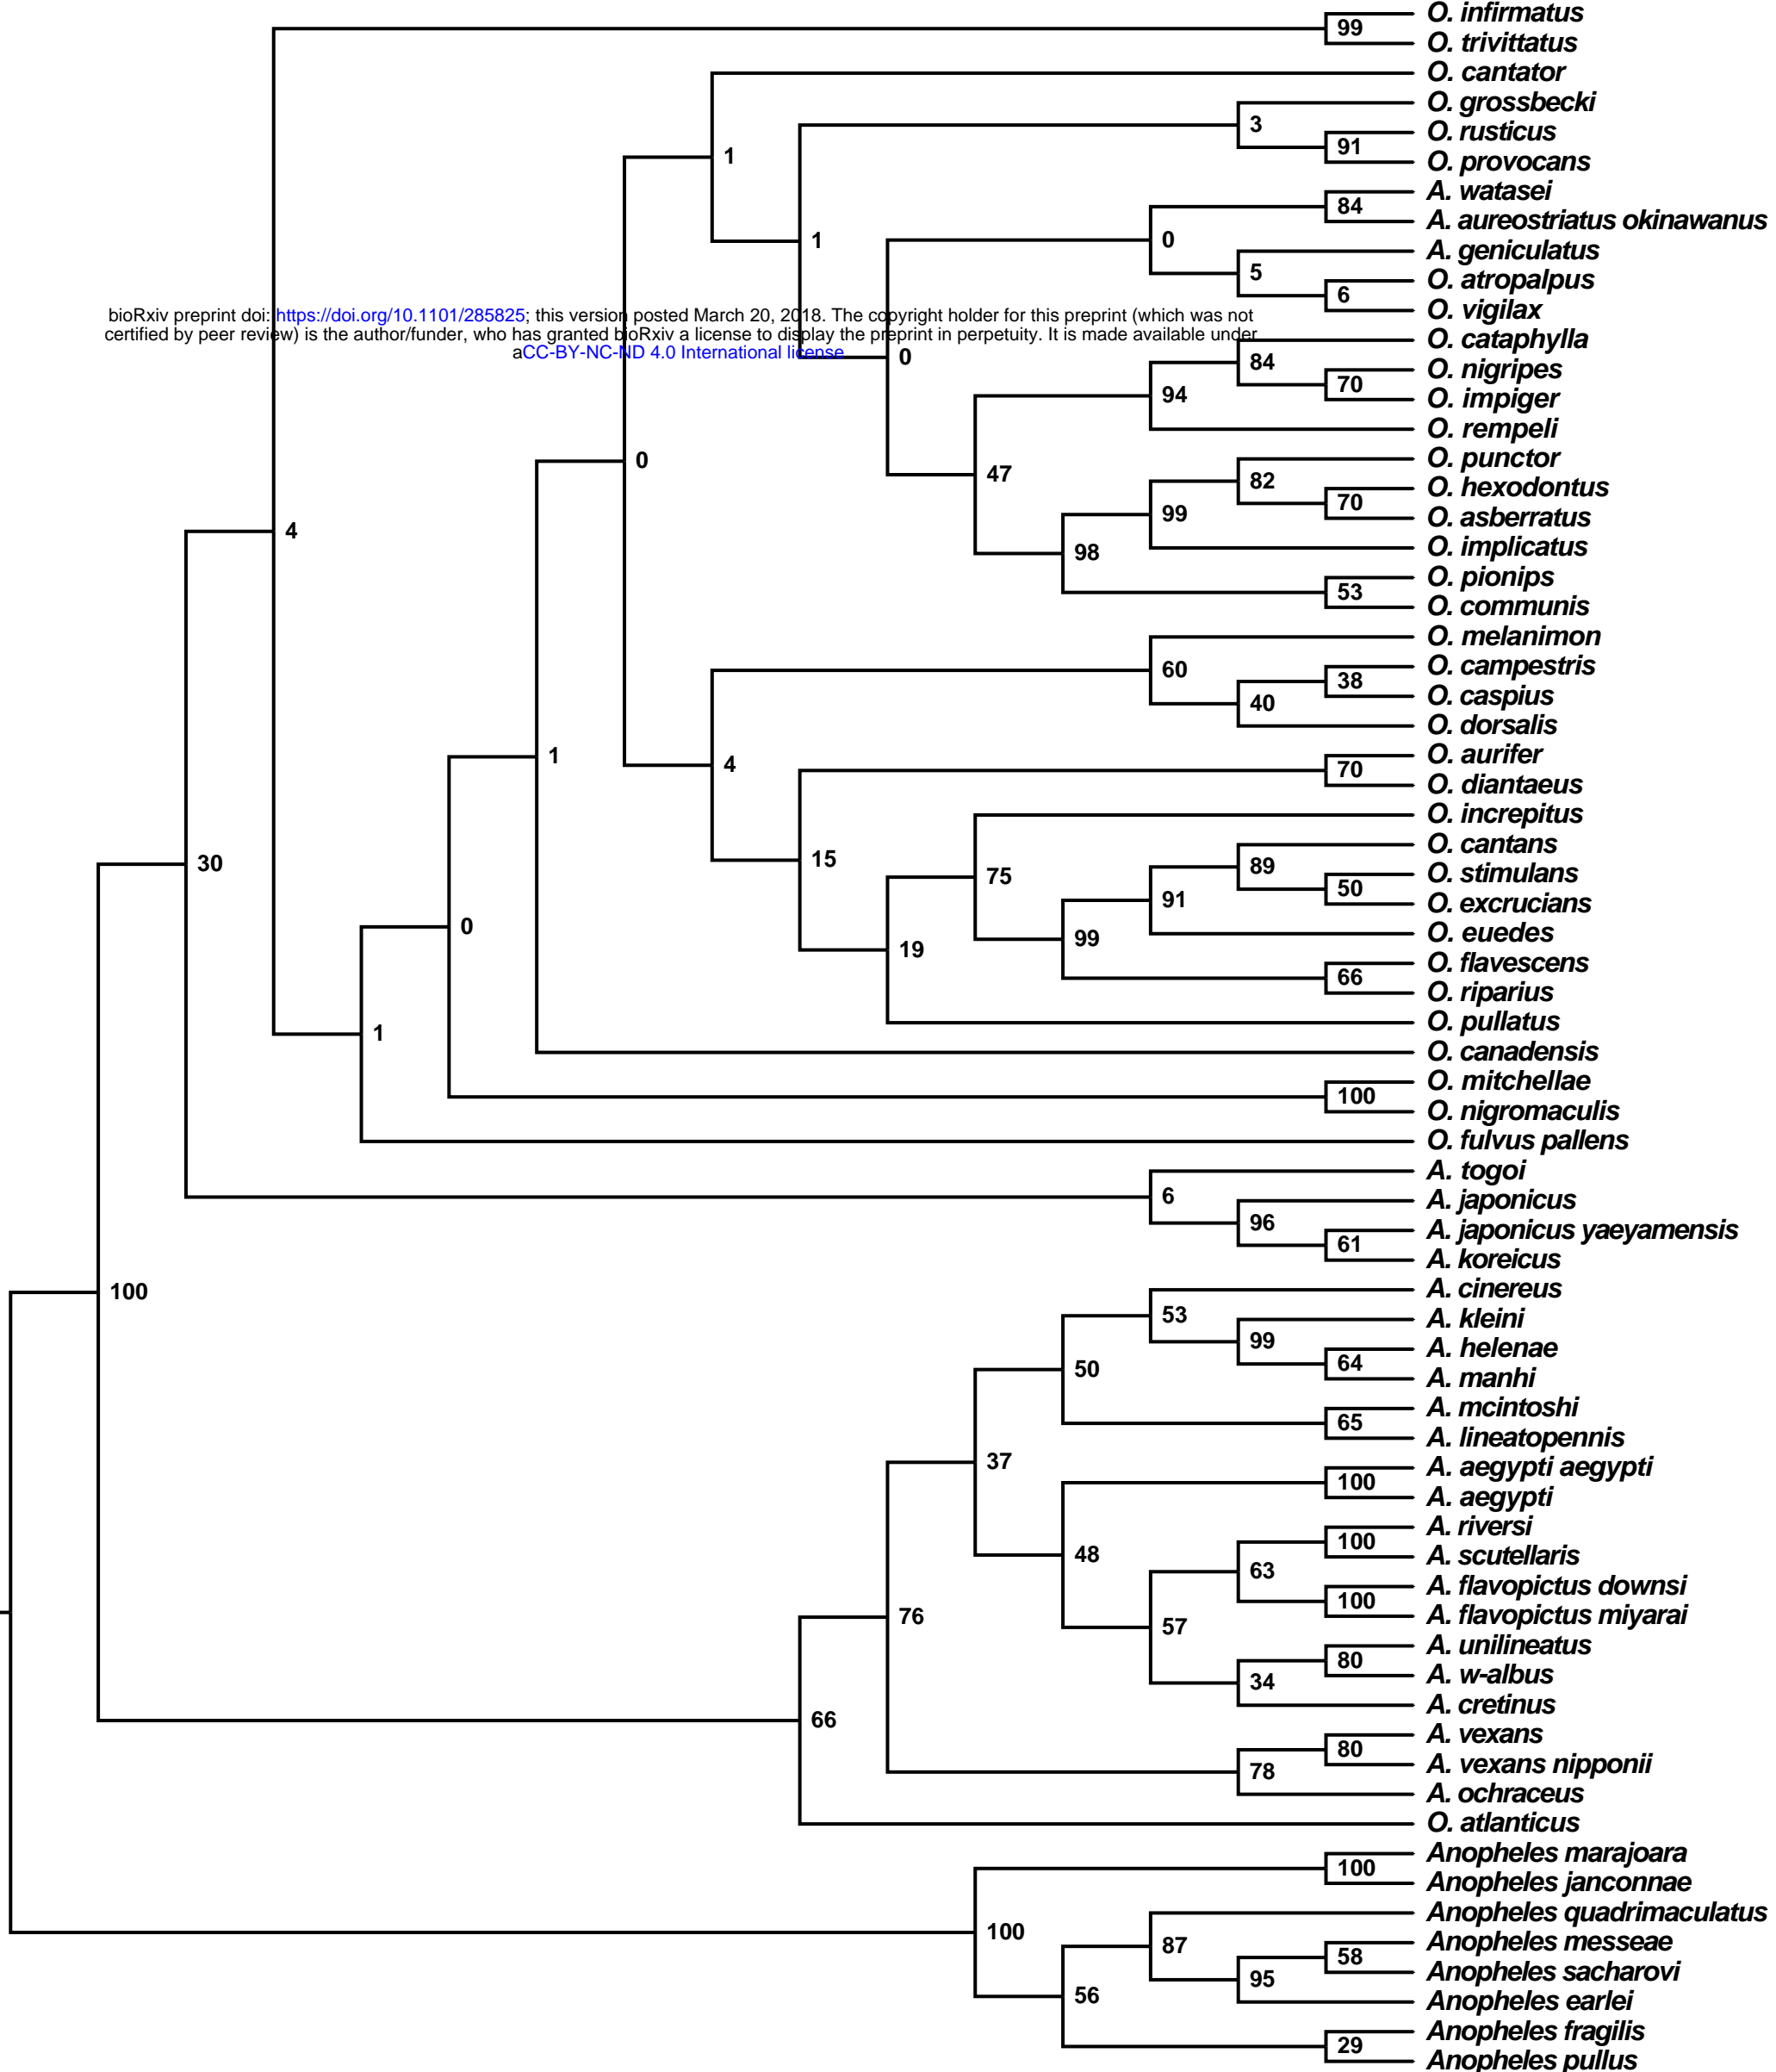

bioRxiv preprint doi: <https://doi.org/10.1101/285825>; this version posted March 20, 2018. The copyright holder for this preprint (which was not certified by peer review) is the author/funder, who has granted bioRxiv a license to display the preprint in perpetuity. It is made available under aCC-BY-NC-ND 4.0 International license.

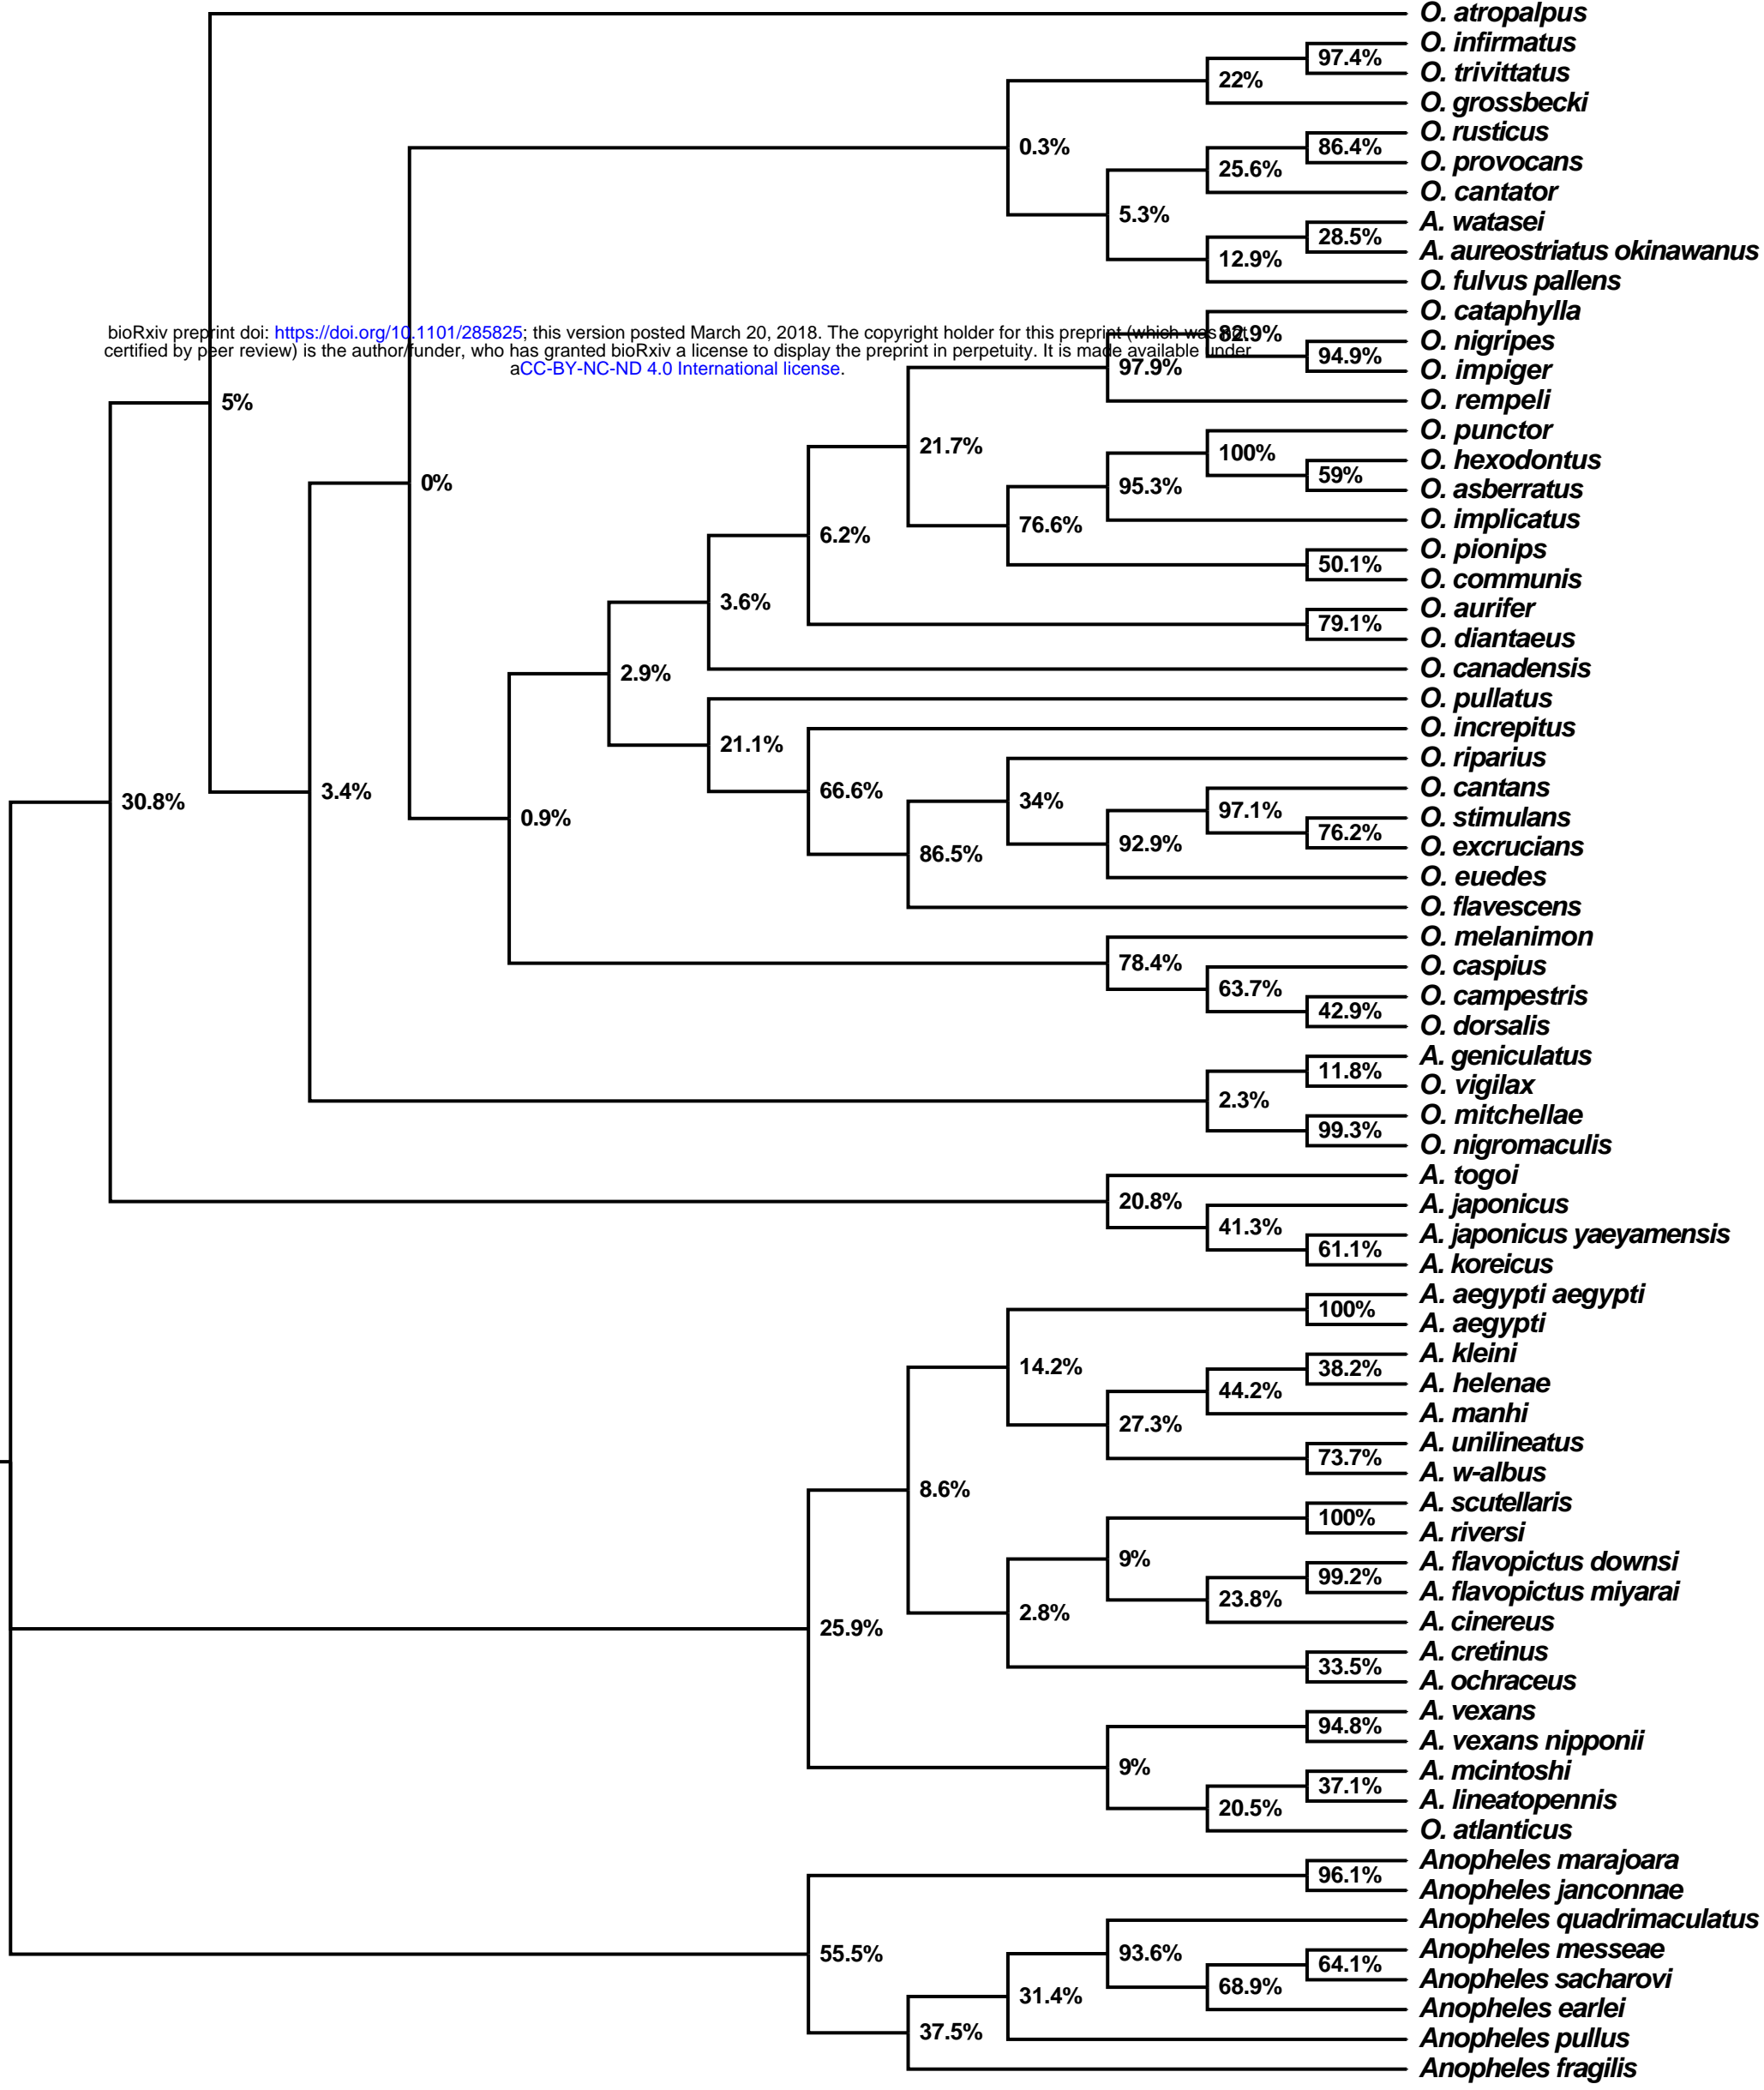

bioRxiv preprint doi: <https://doi.org/10.1101/285825>; this version posted March 20, 2018. The copyright holder for this preprint (which was not certified by peer review) is the author/funder, who has granted bioRxiv a license to display the preprint in perpetuity. It is made available under aCC-BY-NC-ND 4.0 International license.

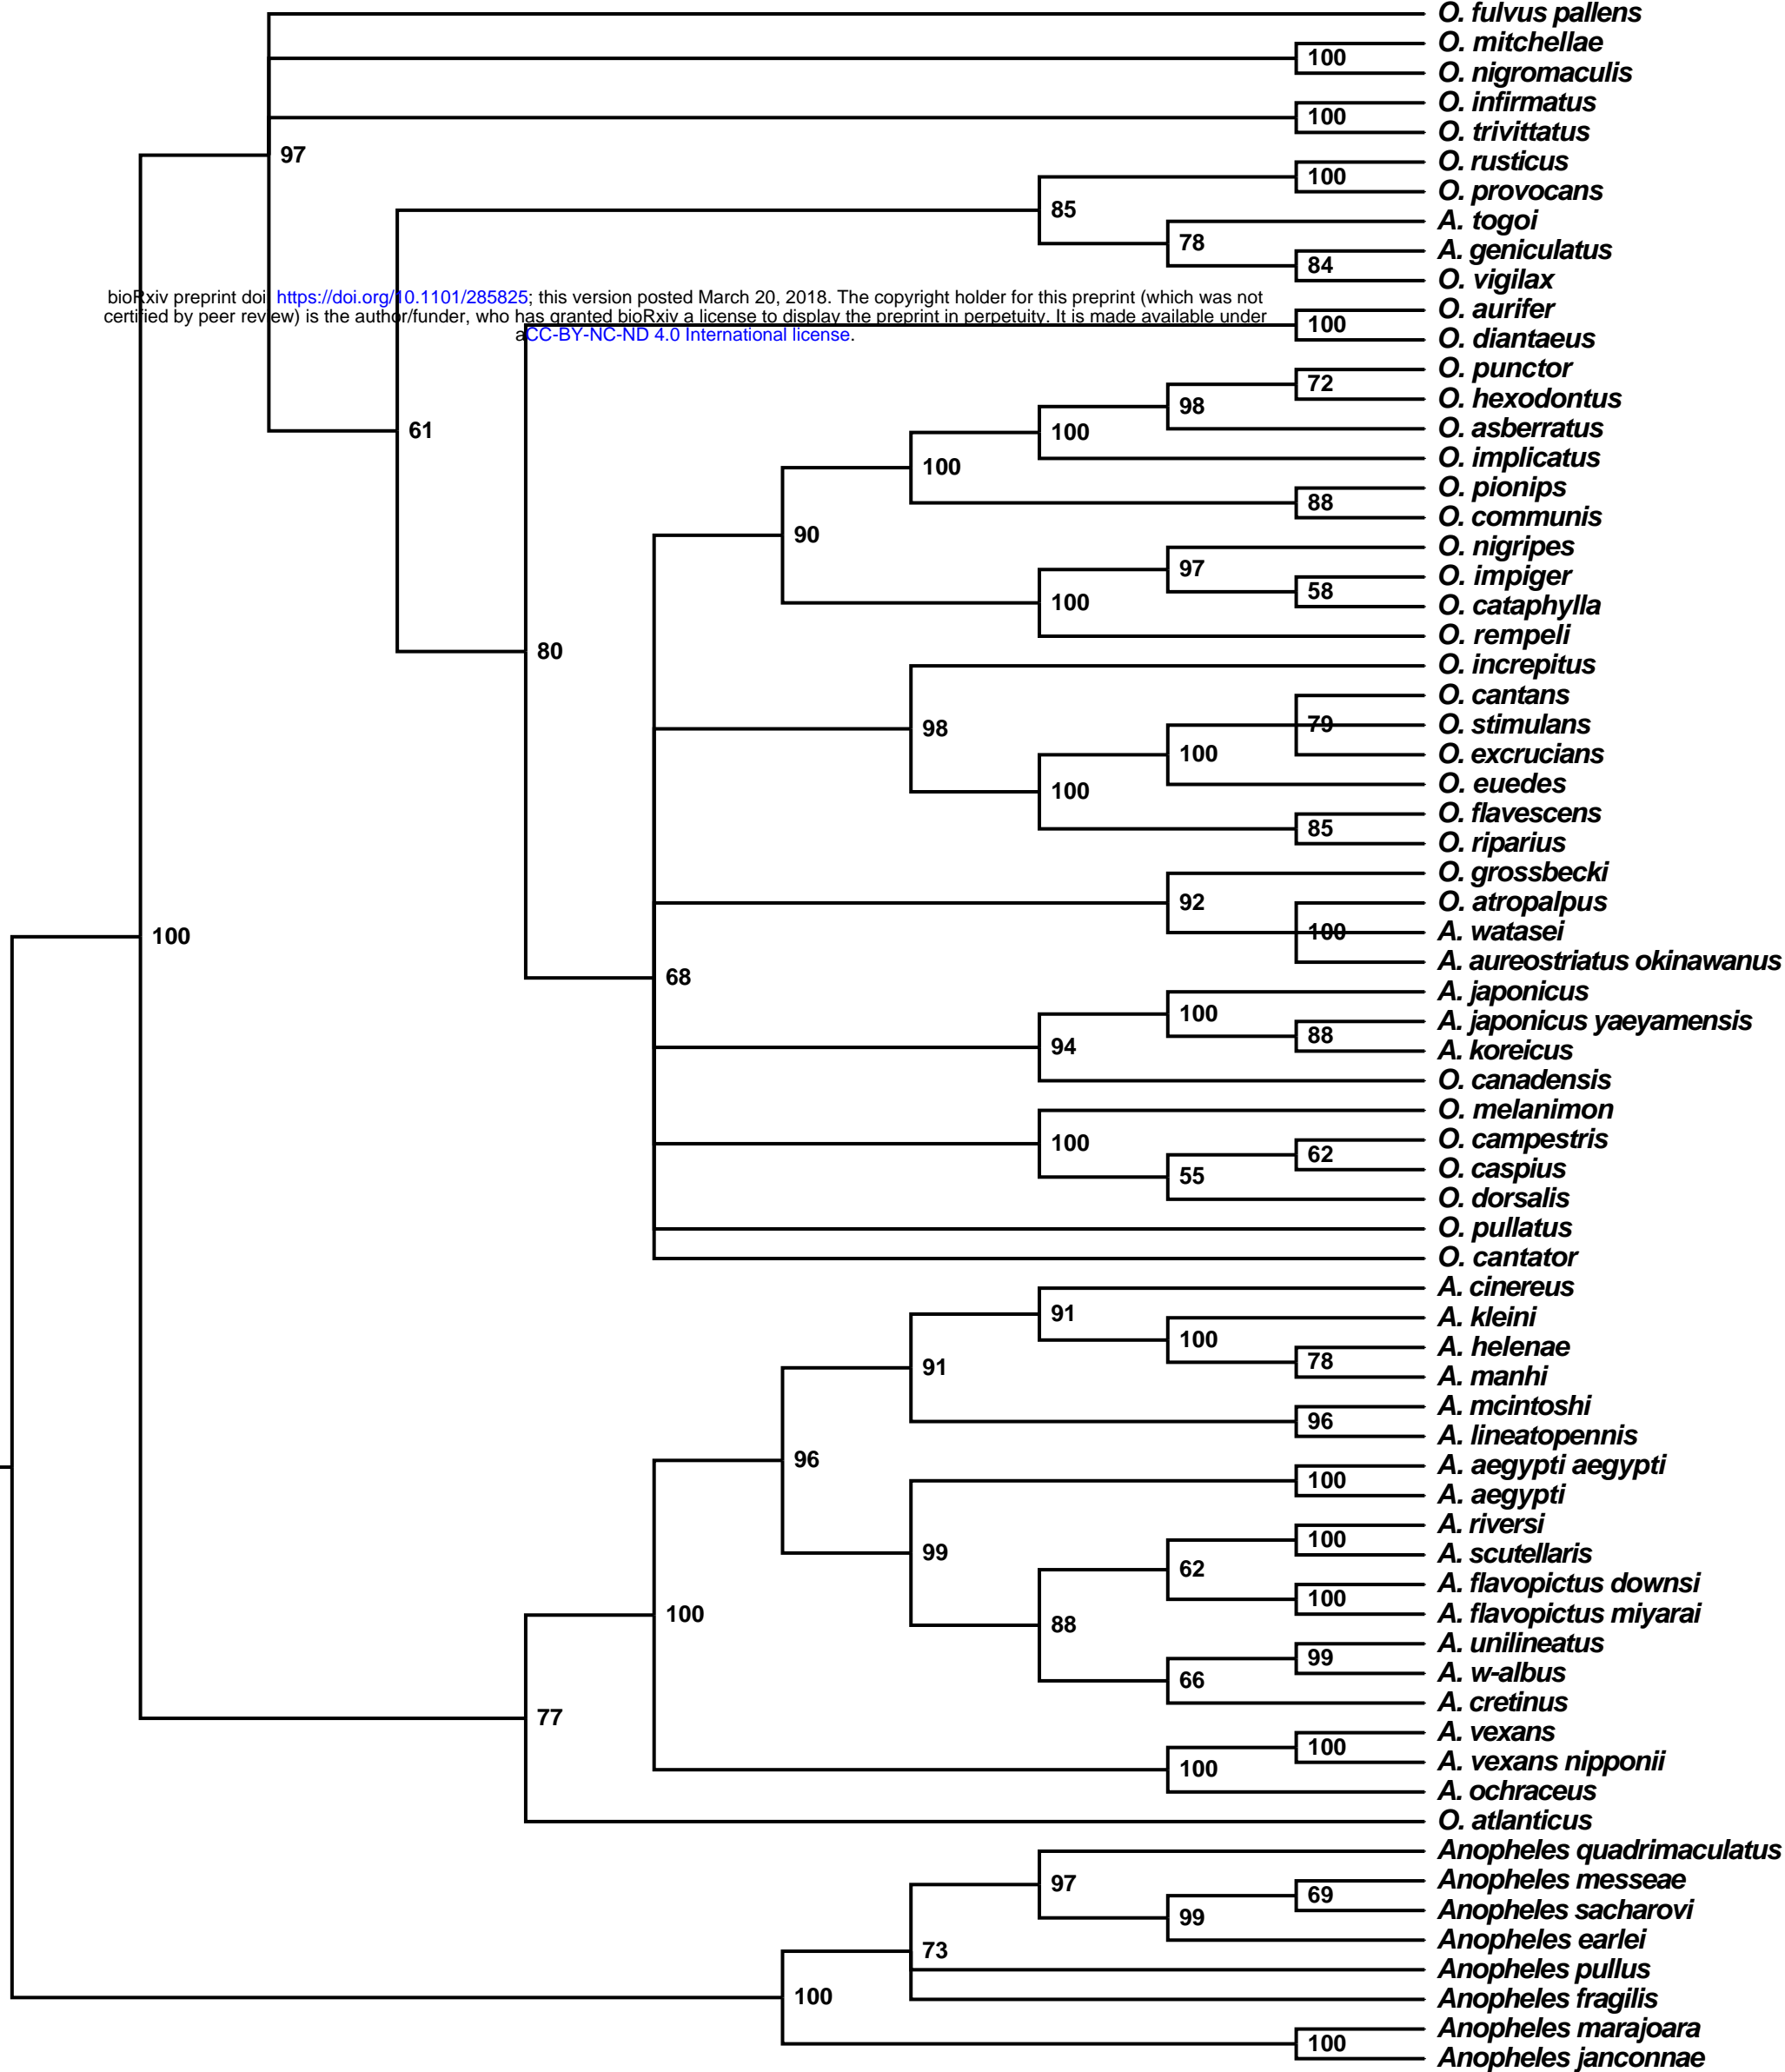

Source: http://biorxiv.org/content/10.1101/285825v1.full.pdf
